# Supplementary material for: Impact of the Result of Soccer Matches on the Heart Rate Variability of Women Soccer Players
Source: MDPI journal article supplement (doi:10.3390/ijerph18179414), 2021-09-06
Supplement: s1 [file s1]

Supplementary Table S1. Shapiro-Wilk test

| <b>Variable</b> | <b>Baseline<br/>Win match<br/>(p-value)</b> | <b>Baseline Loss<br/>Match<br/>(p-value)</b> | <b>After win<br/>match<br/>(p-value)</b> | <b>After lose<br/>match<br/>(p-value)</b> |
|-----------------|---------------------------------------------|----------------------------------------------|------------------------------------------|-------------------------------------------|
| PNS Index       | 0.046                                       | 0.023                                        | 0.005                                    | 0.039                                     |
| SNS Index       | 0.003                                       | 0.046                                        | 0.125                                    | 0.015                                     |
| Stress Index    | 0.012                                       | 0.056                                        | 0.068                                    | 0.049                                     |
| mean HR         | 0.057                                       | 0.045                                        | 0.062                                    | 0.050                                     |
| RR              | 0.005                                       | 0.069                                        | 0.120                                    | 0.046                                     |
| pNN50           | 0.025                                       | 0.040                                        | 0.096                                    | 0.026                                     |
| RMSSD           | 0.042                                       | 0.036                                        | 0.120                                    | 0.051                                     |
| HF              | 0.080                                       | 0.045                                        | 0.074                                    | 0.035                                     |
| LF              | 0.095                                       | 0.020                                        | 0.056                                    | 0.046                                     |
| LF/HF           | 0.075                                       | 0.038                                        | 0.064                                    | 0.023                                     |
| Total power     | 0.045                                       | 0.041                                        | 0.051                                    | 0.036                                     |
| SD1             | 0.005                                       | 0.001                                        | 0.025                                    | 0.021                                     |
| SD2             | 0.008                                       | 0.009                                        | 0.042                                    | 0.015                                     |
